# Supplementary material for: Social and Institutional Status of Area Exclosure in North Wollo and Waghemira Zones, Northeastern Ethiopia
Source: Hindawi journal article supplement (doi:10.1155/2022/9368955), 2022-05-11
Supplement: f1 [file 9368955.f1.pdf]

| RID | AGE | G | EduStat | LSI | LanDeg | SeTyofDeg | DeF | ForsCons | ForestPoly |
|-----|-----|---|---------|-----|--------|-----------|-----|----------|------------|
| 1   | 32  | 1 | 4       | 1.5 | 1      | 2         | 1   | 2        | 2          |
| 2   | 25  | 1 | 4       | 0.5 | 1      | 2         | 1   | 2        | 2          |
| 3   | 48  | 2 | 1       | 3   | 1      | 1         | 1   | 2        | 2          |
| 4   | 56  | 1 | 5       | 3   | 1      | 4         | 1   | 2        | 2          |
| 5   | 46  | 1 | 2       | 4   | 1      | 4         | 1   | 2        | 2          |
| 6   | 45  | 2 | 2       | 1.5 | 1      | 1         | 1   | 2        | 2          |
| 7   | 56  | 1 | 1       | 2.5 | 1      | 4         | 1   | 2        | 2          |
| 8   | 32  | 1 | 5       | 1.5 | 1      | 4         | 1   | 2        | 2          |
| 9   | 27  | 1 | 2       | 0.5 | 1      | 2         | 1   | 2        | 2          |
| 10  | 42  | 1 | 2       | 0.5 | 1      | 4         | 1   | 2        | 2          |
| 11  | 24  | 1 | 4       | 1   | 2      | 4         | 1   | 2        | 2          |
| 12  | 35  | 1 | 5       | 2   | 2      | 4         | 1   | 2        | 2          |
| 13  | 30  | 1 | 4       | 1   | 2      | 4         | 1   | 2        | 2          |
| 14  | 35  | 1 | 5       | 1   | 2      | 4         | 1   | 2        | 2          |
| 15  | 40  | 1 | 2       | 1.5 | 2      | 4         | 1   | 2        | 2          |
| 16  | 30  | 1 | 2       | 1   | 1      | 2         | 1   | 2        | 2          |
| 17  | 22  | 2 | 4       | 1.5 | 1      | 2         | 1   | 2        | 2          |
| 18  | 25  | 1 | 4       | 0.5 | 1      | 2         | 1   | 2        | 2          |
| 19  | 27  | 1 | 3       | 0.5 | 1      | 2         | 1   | 2        | 2          |
| 20  | 25  | 1 | 2       | 1   | 1      | 2         | 1   | 2        | 2          |
| 21  | 42  | 2 | 2       | 1   | 1      | 2         | 4   | 2        | 2          |
| 22  | 45  | 1 | 5       | 1   | 1      | 1         | 4   | 2        | 2          |
| 23  | 38  | 1 | 4       | 1.5 | 1      | 1         | 4   | 2        | 2          |
| 24  | 27  | 1 | 4       | 0   | 1      | 1         | 4   | 2        | 2          |
| 25  | 50  | 1 | 5       | 2   | 1      | 4         | 4   | 2        | 2          |
| 26  | 26  | 1 | 4       | 0   | 1      | 4         | 2   | 2        | 2          |
| 27  | 47  | 1 | 2       | 1.5 | 1      | 4         | 2   | 2        | 2          |
| 28  | 62  | 1 | 1       | 3   | 1      | 4         | 2   | 2        | 2          |
| 29  | 42  | 1 | 2       | 3   | 1      | 4         | 2   | 2        | 2          |
| 30  | 38  | 2 | 1       | 2.5 | 1      | 4         | 2   | 2        | 3          |
| 31  | 45  | 1 | 1       | 2   | 1      | 4         | 3   | 5        | 3          |
| 32  | 25  | 1 | 4       | 0   | 1      | 4         | 3   | 5        | 3          |
| 33  | 40  | 1 | 1       | 1   | 1      | 1         | 3   | 5        | 3          |
| 34  | 24  | 1 | 4       | 0   | 1      | 1         | 3   | 5        | 3          |
| 35  | 35  | 1 | 1       | 0.5 | 1      | 1         | 3   | 5        | 3          |
| 36  | 49  | 1 | 1       | 3   | 1      | 1         | 3   | 5        | 3          |
| 37  | 38  | 1 | 1       | 1   | 1      | 4         | 3   | 3        | 3          |
| 38  | 45  | 1 | 2       | 1.5 | 1      | 4         | 3   | 3        | 3          |
| 39  | 26  | 1 | 4       | 0   | 1      | 4         | 3   | 3        | 3          |
| 40  | 52  | 2 | 1       | 0.5 | 1      | 4         | 3   | 3        | 3          |
| 41  | 32  | 1 | 5       | 1   | 1      | 4         | 3   | 3        | 3          |
| 42  | 41  | 1 | 1       | 2   | 1      | 4         | 3   | 3        | 3          |
| 43  | 29  | 1 | 4       | 0   | 1      | 4         | 3   | 3        | 3          |
| 44  | 47  | 1 | 1       | 0.5 | 1      | 4         | 3   | 3        | 3          |
| 45  | 35  | 1 | 1       | 0   | 1      | 2         | 3   | 3        | 4          |

| Folnst | REST | StaT | TYPRESTN | WhoINt | Perc | partpn | WHYPART | LevlofPart |
|--------|------|------|----------|--------|------|--------|---------|------------|
| 2      | 1    | 2000 | 1        | 1      | 1    | 2      | 1       | 4          |
| 2      | 1    | 2000 | 1        | 1      | 1    | 2      | 1       | 4          |
| 2      | 1    | 2000 | 1        | 1      | 1    | 2      | 2       | 4          |
| 2      | 1    | 2000 | 1        | 1      | 1    | 2      | 1       | 4          |
| 2      | 1    | 1995 | 1        | 1      | 1    | 2      | 1       | 4          |
| 2      | 1    | 1995 | 1        | 1      | 1    | 2      | 2       | 4          |
| 2      | 1    | 1995 | 1        | 1      | 1    | 2      | 2       | 4          |
| 2      | 1    | 1995 | 1        | 1      | 1    | 2      | 3       | 4          |
| 2      | 1    | 2000 | 1        | 1      | 1    | 2      | 1       | 4          |
| 2      | 1    | 2000 | 1        | 1      | 1    | 1      | 1       | 4          |
| 3      | 1    | 2000 | 1        | 1      | 2    | 1      | 2       | 4          |
| 3      | 1    | 2000 | 1        | 1      | 2    | 1      | 2       | 4          |
| 3      | 1    | 2000 | 1        | 1      | 2    | 1      | 1       | 4          |
| 3      | 1    | 2000 | 1        | 1      | 2    | 1      | 1       | 5          |
| 1      | 1    | 2000 | 1        | 1      | 2    | 1      | 1       | 5          |
| 1      | 1    | 2000 | 2        | 1      | 2    | 2      | 1       | 5          |
| 1      | 1    | 1995 | 2        | 1      | 2    | 2      | 1       | 5          |
| 3      | 1    | 1995 | 2        | 1      | 2    | 2      | 1       | 5          |
| 3      | 1    | 1995 | 2        | 1      | 2    | 1      | 1       | 6          |
| 2      | 1    | 1995 | 2        | 1      | 2    | 1      | 1       | 6          |
| 2      | 2    | 2000 | 2        | 1      | 2    | 1      | 1       | 6          |
| 3      | 2    | 2000 | 2        | 1      | 2    | 1      | 2       | 6          |
| 3      | 2    | 2000 | 2        | 1      | 2    | 1      | 2       | 6          |
| 2      | 2    | 2000 | 2        | 1      | 2    | 1      | 2       | 6          |
| 2      | 2    | 2000 | 2        | 1      | 2    | 1      | 1       | 6          |
| 2      | 2    | 2000 | 2        | 2      | 2    | 2      | 1       | 6          |
| 2      | 2    | 2000 | 2        | 2      | 2    | 2      | 1       | 6          |
| 2      | 2    | 2000 | 2        | 2      | 2    | 2      | 1       | 6          |
| 2      | 2    | 1995 | 2        | 2      | 2    | 2      | 1       | 6          |
| 2      | 1    | 1995 | 2        | 2      | 2    | 2      | 1       | 6          |
| 2      | 1    | 1995 | 3        | 2      | 2    | 2      | 1       | 6          |
| 2      | 1    | 1995 | 3        | 2      | 2    | 1      | 1       | 6          |
| 2      | 1    | 2000 | 3        | 2      | 2    | 1      | 2       | 5          |
| 2      | 1    | 2000 | 3        | 2      | 2    | 1      | 2       | 5          |
| 2      | 1    | 2000 | 3        | 2      | 2    | 2      | 2       | 5          |
| 3      | 1    | 2000 | 4        | 4      | 2    | 2      | 2       | 5          |
| 3      | 1    | 2000 | 4        | 4      | 2    | 2      | 2       | 1          |
| 3      | 1    | 2000 | 4        | 4      | 2    | 1      | 2       | 1          |
| 3      | 1    | 2000 | 4        | 4      | 2    | 1      | 2       | 1          |
| 3      | 1    | 1995 | 4        | 4      | 2    | 1      | 2       | 1          |
| 2      | 1    | 1995 | 4        | 4      |      | 2      | 2       | 1          |
| 2      | 1    | 1995 | 4        | 4      |      | 2      | 2       | 3          |
| 2      | 1    | 1995 | 4        | 4      |      |        | 1       | 3          |
| 2      | 1    | 2000 | 4        | 4      |      |        | 1       | 3          |
| 2      | 1    | 2000 | 4        | 4      |      |        | 1       | 3          |

| EVAIn | ByWHatCri | Whoeva | SUCC | Econom | SoclVal | Diffculties | INSTtn | WhatTyp | BayLaw |
|-------|-----------|--------|------|--------|---------|-------------|--------|---------|--------|
| 1     | 1         | 1      | 2    | 1      | 1       | 1           | 1      | 3       | 1      |
| 1     | 2         | 1      | 2    | 1      | 1       | 1           | 1      | 3       | 1      |
| 1     | 3         | 1      | 2    | 1      | 1       | 1           | 1      | 3       | 1      |
| 1     | 4         | 1      | 2    | 1      | 1       | 1           | 1      |         | 1      |
| 1     | 5         | 1      | 2    | 1      | 1       | 1           | 1      | 3       | 1      |
| 1     | 1         | 1      | 2    | 1      | 1       | 1           | 1      | 3       | 1      |
| 1     | 2         | 1      | 2    | 1      | 1       | 1           | 1      | 3       | 1      |
| 1     | 3         | 1      | 2    | 1      | 1       | 1           | 1      | 3       | 1      |
| 1     | 4         | 1      | 2    | 1      | 1       | 1           | 1      |         |        |
| 1     | 5         | 1      | 2    | 1      | 1       | 1           | 1      |         | 1      |
| 1     | 1         | 1      | 2    | 1      | 1       | 1           | 1      |         | 1      |
| 1     | 2         | 1      | 2    | 1      | 1       | 1           | 1      | 3       | 1      |
| 2     | 3         | 1      | 2    | 1      | 1       | 1           | 1      | 3       |        |
| 2     | 4         | 1      | 2    | 1      | 1       | 1           | 1      | 3       | 1      |
| 2     | 5         | 1      | 2    | 1      | 1       | 1           | 1      | 3       | 1      |
| 2     | 1         | 3      |      | 1      | 1       | 1           | 1      | 3       | 1      |
| 2     | 2         | 3      |      | 1      | 1       | 1           | 1      | 3       | 1      |
| 2     | 3         | 3      |      | 1      | 1       | 1           | 1      | 3       | 1      |
| 2     | 4         | 3      |      | 1      | 1       | 1           | 1      | 3       |        |
| 2     | 5         | 3      |      | 1      | 1       | 1           | 1      | 3       | 1      |
| 2     | 1         | 3      |      | 4      | 1       | 1           | 1      | 3       | 1      |
| 2     | 1         | 3      | 2    | 4      | 1       | 1           | 1      | 3       | 1      |
| 2     | 1         | 3      | 2    | 4      | 1       | 1           | 1      | 3       | 1      |
| 2     | 2         | 3      | 2    | 4      | 1       | 1           | 1      | 3       | 1      |
| 2     | 2         | 2      | 2    | 3      | 2       | 1           | 1      | 3       | 1      |
| 2     | 2         | 2      | 2    | 3      | 2       | 1           | 1      | 3       |        |
| 2     | 2         | 2      | 2    | 3      | 2       | 1           | 1      | 3       | 1      |
| 2     | 3         | 2      | 2    | 3      | 2       | 1           | 1      |         | 1      |
| 2     | 3         | 2      | 2    | 3      | 3       | 1           | 1      |         | 1      |
| 2     | 3         | 5      | 2    | 3      | 3       | 1           | 1      |         | 1      |
| 2     | 3         | 5      | 2    | 3      | 3       | 1           | 1      | 3       | 1      |
| 2     | 4         | 5      | 2    | 3      | 3       | 1           | 1      | 2       | 1      |
| 2     | 4         | 5      | 2    | 3      | 3       | 1           | 1      | 1       | 1      |
| 2     | 4         | 5      | 1    | 5      | 3       | 1           | 1      | 2       | 1      |
| 2     | 5         | 7      | 1    | 55     | 3       | 2           | 1      | 1       | 1      |
| 2     | 5         | 5      | 1    | 5      | 3       | 2           | 1      | 2       | 1      |
| 2     | 5         | 5      | 1    | 5      | 3       | 2           | 1      | 1       |        |
| 2     | 5         | 5      | 1    | 5      | 3       | 2           | 1      | 2       | 1      |
| 2     | 5         | 7      | 1    | 5      | 5       | 2           | 1      | 1       | 1      |
| 2     | 5         | 7      |      | 5      | 5       | 2           | 1      | 3       | 1      |
| 2     | 5         | 7      |      | 5      | 5       | 2           | 1      |         |        |
| 2     | 5         | 7      | 1    | 5      | 5       | 2           | 1      |         | 1      |
| 2     | 5         | 7      | 1    | 5      | 5       | 2           | 1      |         | 1      |



| RID | AGE | G | EduStat | LSI | LanDeg | SeTyofDeg | DeF | ForsCons | ForestPoly |   |
|-----|-----|---|---------|-----|--------|-----------|-----|----------|------------|---|
| 1   | 32  | 1 | 1       | 4   | 2      | 1         | 1   | 1        | 2          | 2 |
| 2   | 25  | 1 | 1       | 4   | 1      | 1         | 1   | 1        | 2          | 2 |
| 3   | 48  | 2 | 2       | 1   | 3      | 1         | 1   | 1        | 2          | 2 |
| 4   | 56  | 1 | 1       | 5   | 3      | 1         | 1   | 1        | 2          | 2 |
| 5   | 46  | 1 | 1       | 2   | 4      | 1         | 1   | 1        | 2          | 2 |
| 6   | 45  | 2 | 2       | 2   | 2      | 1         | 1   | 1        | 2          | 2 |
| 7   | 56  | 1 | 1       | 1   | 3      | 1         | 1   | 1        | 2          | 2 |
| 8   | 32  | 1 | 1       | 5   | 2      | 1         | 1   | 1        | 2          | 2 |
| 9   | 27  | 1 | 1       | 2   | 1      | 1         | 1   | 1        | 2          | 2 |
| 10  | 42  | 1 | 1       | 2   | 1      | 1         | 1   | 1        | 2          | 2 |
| 11  | 24  | 1 | 1       | 4   | 1      | 1         | 1   | 1        | 2          | 2 |
| 12  | 35  | 1 | 1       | 5   | 2      | 1         | 1   | 1        | 2          | 2 |
| 13  | 30  | 1 | 1       | 4   | 1      | 1         | 1   | 1        | 2          | 2 |
| 14  | 35  | 1 | 1       | 5   | 1      | 1         | 1   | 1        | 2          | 2 |
| 15  | 40  | 1 | 1       | 2   | 2      | 1         | 1   | 1        | 2          | 2 |
| 16  | 30  | 1 | 1       | 2   | 1      | 1         | 2   | 1        | 2          | 2 |
| 17  | 22  | 2 | 2       | 4   | 2      | 1         | 2   | 1        | 2          | 2 |
| 18  | 25  | 1 | 1       | 4   | 1      | 1         | 2   | 1        | 2          | 2 |
| 19  | 27  | 1 | 1       | 3   | 1      | 1         | 2   | 1        | 2          | 2 |
| 20  | 25  | 1 | 1       | 2   | 1      | 1         | 2   | 1        | 2          | 2 |
| 21  | 42  | 2 | 2       | 2   | 1      | 1         | 2   | 4        | 2          | 2 |
| 22  | 45  | 1 | 1       | 5   | 1      | 1         | 2   | 4        | 2          | 2 |
| 23  | 38  | 1 | 1       | 4   | 2      | 1         | 2   | 4        | 2          | 2 |
| 24  | 27  | 1 | 1       | 4   | 0      | 1         | 2   | 4        | 2          | 2 |
| 25  | 50  | 1 | 1       | 5   | 2      | 1         | 2   | 4        | 2          | 2 |
| 26  | 26  | 1 | 1       | 4   | 0      | 1         | 3   | 2        | 2          | 2 |
| 27  | 47  | 1 | 1       | 2   | 2      | 1         | 3   | 2        | 2          | 2 |
| 28  | 62  | 1 | 1       | 1   | 3      | 1         | 3   | 2        | 2          | 2 |
| 29  | 42  | 1 | 1       | 2   | 3      | 1         | 3   | 2        | 2          | 2 |
| 30  | 38  | 2 | 2       | 1   | 3      | 1         | 3   | 2        | 2          | 3 |
| 31  | 45  | 1 | 1       | 1   | 2      | 1         | 4   | 3        | 5          | 3 |
| 32  | 25  | 1 | 1       | 4   | 0      | 1         | 4   | 3        | 5          | 3 |
| 33  | 40  | 1 | 1       | 1   | 1      | 1         | 4   | 3        | 5          | 3 |
| 34  | 24  | 1 | 1       | 4   | 0      | 1         | 4   | 3        | 5          | 3 |
| 35  | 35  | 1 | 1       | 1   | 1      | 1         | 4   | 3        | 5          | 3 |
| 36  | 49  | 1 | 1       | 1   | 3      | 1         | 4   | 3        | 5          | 3 |
| 37  | 38  | 1 | 1       | 1   | 1      | 1         | 4   | 3        | 3          | 3 |
| 38  | 45  | 1 | 1       | 2   | 2      | 1         | 4   | 3        | 3          | 3 |
| 39  | 26  | 1 | 1       | 4   | 0      | 1         | 4   | 3        | 3          | 3 |
| 40  | 52  | 2 | 2       | 1   | 1      | 1         | 4   | 3        | 3          | 3 |

| Folnst | REST | StaT | TYPRESTN | WhoINt | Perc | partpn | WHYPART | LevlofPart | EVAIn |
|--------|------|------|----------|--------|------|--------|---------|------------|-------|
| 2      | 1    | 2000 | 1        | 1      | 1    | 1      | 1       | 1          | 1     |
| 2      | 1    | 2000 | 1        | 1      | 1    | 1      | 1       | 1          | 1     |
| 2      | 1    | 2000 | 1        | 1      | 1    | 2      | 1       | 1          | 1     |
| 2      | 1    | 2000 | 1        | 1      | 1    | 2      | 1       | 1          | 1     |
| 2      | 1    | 2002 | 1        | 1      | 1    | 1      | 1       | 1          | 1     |
| 2      | 1    | 2002 | 2        | 2      | 1    | 2      | 1       | 1          | 1     |
| 2      | 1    | 2002 | 2        | 2      | 1    | 1      | 1       | 1          | 1     |
| 2      | 1    | 200  | 2        | 2      | 1    | 1      | 2       | 1          | 1     |
| 2      | 1    | 2000 | 2        | 2      | 1    | 1      | 2       | 1          | 1     |
| 2      | 1    | 2000 | 2        | 2      | 1    | 1      | 2       | 1          | 1     |
| 3      | 1    | 2000 | 2        | 3      | 2    | 1      | 2       | 1          | 1     |
| 3      | 1    | 2000 | 2        | 3      | 2    | 1      | 2       | 1          | 1     |
| 3      | 1    | 2000 | 2        | 3      | 3    | 1      | 2       | 1          | 1     |
| 3      | 1    | 2000 | 2        | 3      | 2    | 1      | 2       | 1          | 1     |
| 1      | 1    | 2000 | 2        | 3      | 1    | 1      | 2       | 1          | 1     |
| 1      | 1    | 2000 | 4        | 3      | 2    | 1      | 2       | 1          | 1     |
| 1      | 1    | 2005 | 4        | 3      | 1    | 1      | 2       | 2          | 1     |
| 3      | 1    | 2005 | 4        | 3      | 1    | 1      | 3       | 2          | 1     |
| 3      | 1    | 2006 | 4        | 3      | 1    | 1      | 3       | 2          | 1     |
| 2      | 1    | 2006 | 4        | 3      | 1    | 1      | 3       | 2          | 1     |
| 2      | 2    | 2000 | 4        | 3      | 3    | 2      | 3       | 2          | 1     |
| 3      | 2    | 2000 | 4        | 3      | 1    | 2      | 3       | 2          | 1     |
| 3      | 2    | 2000 | 4        | 3      | 1    | 1      | 1       | 2          | 1     |
| 2      | 2    | 2000 | 4        | 3      | 1    | 1      | 1       | 2          | 1     |
| 2      | 2    | 2000 | 4        | 3      | 2    | 1      | 1       | 2          | 1     |
| 2      | 2    | 2000 | 4        | 3      | 1    | 1      | 1       | 2          | 1     |
| 2      | 2    | 2000 | 4        | 5      | 3    | 1      | 1       | 3          | 1     |
| 2      | 2    | 2000 | 4        | 5      | 3    | 2      | 1       | 3          | 1     |
| 2      | 2    | 2005 | 4        | 5      | 1    | 2      | 1       | 3          | 1     |
| 2      | 1    | 1995 | 4        | 5      | 2    | 2      | 1       | 3          | 1     |
| 2      | 1    | 1995 | 4        | 5      | 1    | 1      | 1       | 3          | 2     |
| 2      | 1    | 1995 | 4        | 5      | 3    | 1      | 1       | 5          | 2     |
| 2      | 1    | 2000 | 4        | 5      | 1    | 1      | 1       | 5          | 2     |
| 2      | 1    | 2000 | 4        | 5      | 1    | 2      | 1       | 5          | 2     |
| 2      | 1    | 2000 | 4        | 5      | 1    | 2      | 1       | 5          | 2     |
| 3      | 1    | 2000 | 4        | 5      | 2    | 1      | 1       | 5          | 2     |
| 3      | 1    | 2000 | 4        | 5      | 1    | 1      | 1       | 5          | 2     |
| 3      | 1    | 2000 | 4        | 5      | 1    | 1      | 1       | 5          | 2     |
| 3      | 1    | 2000 | 3        | 5      | 1    | 1      | 1       | 5          | 2     |
| 3      | 1    | 1995 | 3        | 5      | 1    | 1      | 1       | 5          | 2     |

| ByWhatCri | Whoeva | SUCC | Econom | SoclVal | Diffculties | INSTtn | WhatTyp | BayLaw | WHODEV |
|-----------|--------|------|--------|---------|-------------|--------|---------|--------|--------|
| 5         | 1      | 1    | 8      | 1       | 2           | 1      | 3       | 1      | 1      |
| 5         | 1      | 1    | 8      | 5       | 2           | 1      | 3       | 1      | 1      |
| 1         | 1      | 1    | 8      | 5       | 2           | 1      | 3       | 1      | 1      |
| 1         | 2      | 1    | 8      | 1       | 2           | 1      | 3       |        | 1      |
| 5         | 2      | 1    | 8      | 1       | 2           | 1      | 3       | 1      | 1      |
| 1         | 1      | 1    | 8      | 1       | 2           | 1      | 3       | 1      | 1      |
| 1         | 1      | 2    | 1      | 5       | 2           | 1      | 1       | 1      | 1      |
| 1         | 2      | 1    | 6      | 5       | 1           | 1      | 3       | 1      | 2      |
| 5         | 1      | 1    | 3      | 5       | 2           | 1      | 3       | 1      | 1      |
| 5         | 1      | 1    | 2      | 1       | 2           | 1      | 3       | 1      | 1      |
| 1         | 2      | 2    | 7      | 1       | 2           | 1      | 3       | 1      | 2      |
| 2         | 2      | 2    | 8      | 1       | 2           | 1      | 2       | 1      | 2      |
| 2         | 2      | 1    | 8      | 1       | 1           | 1      | 3       | 1      | 1      |
| 5         | 1      | 1    | 8      | 5       | 2           | 1      | 3       | 2      | 1      |
| 5         | 1      | 1    | 8      | 5       | 2           | 2      | 3       | 2      | 1      |
| 2         | 1      | 1    | 8      | 1       | 2           | 1      | 3       | 1      | 1      |
| 5         | 1      | 1    | 8      | 1       | 2           | 1      | 3       | 1      | 1      |
| 5         | 2      | 1    | 8      | 5       | 2           | 2      | 1       | 1      | 2      |
| 2         | 1      | 2    | 8      | 5       | 2           |        | 3       | 1      | 2      |
| 2         | 1      | 2    | 8      | 1       | 2           |        | 3       | 1      | 1      |
| 5         | 2      | 2    | 8      | 1       | 1           | 2      | 1       | 1      | 1      |
| 3         | 5      | 1    | 1      | 1       | 2           | 1      | 3       | 2      | 1      |
| 5         | 5      | 1    | 6      | 1       | 2           | 1      | 3       | 2      | 2      |
| 3         | 5      | 1    | 3      | 5       | 1           | 1      | 1       | 1      | 1      |
| 5         | 5      | 1    | 2      | 1       | 1           | 1      | 3       | 1      | 1      |
| 5         | 5      | 1    | 7      | 2       | 2           | 1      | 2       | 1      | 1      |
| 5         | 2      | 2    | 8      | 2       | 2           | 1      | 3       | 1      | 1      |
| 5         | 1      | 2    | 8      | 2       | 1           | 2      | 1       | 1      | 3      |
| 5         | 3      | 2    | 8      | 2       | 2           | 1      |         | 1      | 3      |
| 3         | 5      | 1    | 8      | 2       | 2           | 1      | 3       | 1      | 3      |
| 3         | 5      | 1    | 8      | 3       | 1           | 1      | 3       | 2      | 3      |
| 5         | 5      | 1    | 1      | 3       | 2           | 2      | 3       | 1      | 1      |
| 5         | 5      | 1    | 6      | 3       | 2           | 1      | 3       | 1      | 3      |
| 5         | 5      | 1    | 3      | 3       | 1           | 2      | 3       | 1      | 1      |
| 5         | 5      | 1    | 2      | 3       | 2           | 1      |         |        | 3      |
| 5         | 5      | 2    | 7      | 5       | 2           | 1      | 3       | 1      | 1      |
| 2         | 2      | 1    | 8      | 3       | 2           |        | 3       | 1      | 1      |
| 1         | 1      | 1    | 8      | 3       | 2           | 1      | 3       | 2      | 3      |
| 2         | 4      | 1    | 8      | 5       | 2           | 2      |         | 2      | 3      |
| 5         | 5      | 2    | 8      | 3       | 2           | 2      | 3       | 1      | 3      |

| LegalSign | TRUST | Conflct | LIVLIIMP |
|-----------|-------|---------|----------|
| 1         | 1     | 2       | 1        |
| 1         | 1     | 2       | 1        |
| 1         | 1     | 2       | 1        |
| 1         | 1     | 2       | 1        |
| 1         | 1     | 2       | 1        |
| 1         | 1     | 2       | 1        |
| 1         | 1     | 1       | 1        |
|           | 1     | 1       | 3        |
|           | 1     | 1       | 1        |
| 1         | 1     | 1       | 1        |
| 1         | 1     | 1       | 1        |
| 1         | 1     | 2       | 3        |
| 1         | 1     | 2       | 1        |
| 1         | 1     | 2       | 3        |
|           | 1     | 1       | 1        |
| 1         | 1     | 1       | 1        |
| 1         | 1     | 1       | 3        |
| 1         | 1     | 2       | 1        |
| 2         | 1     | 1       | 2        |
| 1         | 1     | 2       | 1        |
| 1         |       | 1       | 2        |
| 1         | 1     | 2       | 1        |
| 2         | 1     | 2       | 2        |
| 2         | 1     | 2       | 1        |
| 1         | 1     | 2       | 2        |
| 1         | 1     | 2       | 1        |
| 1         | 1     | 2       | 2        |
| 1         |       | 2       | 2        |
| 1         |       | 2       | 2        |
| 1         | 1     | 2       | 3        |
| 1         | 1     | 2       | 3        |
| 2         | 2     | 2       | 3        |
| 2         | 2     | 2       |          |
| 1         | 2     | 2       | 1        |
| 2         |       | 1       | 1        |
| 1         | 2     | 2       | 1        |
| 2         | 2     | 2       | 1        |
|           | 2     | 2       | 2        |
| 1         | 2     | 2       | 2        |
| 1         | 1     | 2       | 3        |

| Agro ecology | AGE | G  | EduStat | LSI | LanDeg | SeTyofDeg | DeF |   |
|--------------|-----|----|---------|-----|--------|-----------|-----|---|
| highland     |     | 32 | 1       | 4   | 0.5    | 1         | 2   | 4 |
| highland     |     | 25 | 1       | 4   | 0.25   | 1         | 2   | 1 |
| highland     |     | 48 | 2       | 1   | 3      | 1         | 1   | 1 |
| highland     |     | 56 | 1       | 5   | 3      | 1         | 4   | 6 |
| highland     |     | 46 | 1       | 2   | 4      | 1         | 4   | 6 |
| highland     |     | 45 | 2       | 2   | 0.25   | 1         | 1   | 4 |
| highland     |     | 56 | 1       | 1   | 2.5    | 1         | 4   | 4 |
| highland     |     | 32 | 1       | 5   | 0.5    | 1         | 4   | 4 |
| highland     |     | 27 | 1       | 2   | 0.5    | 1         | 2   | 5 |
| highland     |     | 42 | 1       | 2   | 0.375  | 1         | 4   | 5 |
| highland     |     | 24 | 1       | 4   | 0.25   | 1         | 4   | 4 |
| highland     |     | 35 | 1       | 5   | 2      | 1         | 4   | 5 |
| highland     |     | 30 | 1       | 4   | 0.5    | 1         | 4   | 4 |
| highland     |     | 35 | 1       | 5   | 0.5    | 1         | 4   | 4 |
| highland     |     | 40 | 1       | 2   | 0.5    | 1         | 4   | 4 |
| highland     |     | 30 | 1       | 2   | 0.5    | 1         | 2   | 4 |
| highland     |     | 22 | 2       | 4   | 0.5    | 1         | 2   | 1 |
| highland     |     | 25 | 1       | 4   | 0.25   | 1         | 2   | 1 |
| highland     |     | 27 | 1       | 3   | 0.5    | 1         | 2   | 1 |
| highland     |     | 25 | 1       | 2   | 1      | 1         | 2   | 1 |
| highland     |     | 42 | 2       | 2   | 1      | 1         | 2   | 1 |
| highland     |     | 45 | 1       | 5   | 1      | 1         | 1   | 1 |
| highland     |     | 38 | 1       | 4   | 0.5    | 1         | 1   | 1 |
| highland     |     | 27 | 1       | 4   | 0      | 1         | 1   | 1 |
| highland     |     | 50 | 1       | 5   | 2      | 1         | 4   | 6 |
| highland     |     | 26 | 1       | 4   | 0      | 1         | 4   | 6 |
| highland     |     | 47 | 1       | 2   | 1.5    | 1         | 4   | 6 |
| highland     |     | 62 | 1       | 1   | 3      | 1         | 4   | 6 |
| highland     |     | 42 | 1       | 2   | 3      | 1         | 4   | 6 |
| highland     |     | 38 | 2       | 1   | 2.5    | 1         | 4   | 6 |
| highland     |     | 45 | 1       | 1   | 2      | 1         | 4   | 6 |
| highland     |     | 25 | 1       | 4   | 0      | 1         | 4   | 6 |
| highland     |     | 40 | 1       | 1   | 1      | 1         | 1   | 4 |
| highland     |     | 24 | 1       | 4   | 0      | 1         | 1   | 4 |
| highland     |     | 35 | 1       | 1   | 0.5    | 1         | 1   | 4 |
| highland     |     | 49 | 1       | 1   | 3      | 1         | 1   | 4 |
| highland     |     | 38 | 1       | 1   | 1      | 1         | 4   | 4 |
| highland     |     | 45 | 1       | 2   | 1.5    | 1         | 4   | 4 |
| highland     |     | 26 | 1       | 4   | 0      | 1         | 4   | 4 |
| highland     |     | 52 | 2       | 1   | 0.5    | 1         | 4   | 4 |
| highland     |     | 32 | 1       | 5   | 1      | 1         | 4   | 5 |
| highland     |     | 41 | 1       | 1   | 2      | 1         | 4   | 5 |
| highland     |     | 29 | 1       | 4   | 0      | 1         | 4   | 5 |
| highland     |     | 47 | 1       | 1   | 0.5    | 1         | 4   | 5 |
| highland     |     | 35 | 1       | 1   | 0      | 1         | 2   | 5 |
| highland     |     | 42 | 2       | 1   | 2      | 1         | 2   | 5 |

|              |    |   |   |     |   |   |   |
|--------------|----|---|---|-----|---|---|---|
| highland     | 36 | 1 | 1 | 0   | 1 | 2 | 5 |
| highland     | 43 | 1 | 1 | 1   | 1 | 2 | 5 |
| mid-altitude | 32 | 1 | 4 | 2   | 1 | 1 | 1 |
| mid-altitude | 25 | 1 | 4 | 1   | 1 | 1 | 1 |
| mid-altitude | 48 | 2 | 1 | 3   | 1 | 1 | 1 |
| mid-altitude | 56 | 1 | 5 | 3   | 1 | 1 | 1 |
| mid-altitude | 46 | 1 | 2 | 4   | 1 | 1 | 1 |
| mid-altitude | 45 | 2 | 2 | 2   | 1 | 1 | 1 |
| mid-altitude | 56 | 1 | 1 | 3   | 1 | 1 | 1 |
| mid-altitude | 32 | 1 | 5 | 2   | 1 | 1 | 1 |
| mid-altitude | 27 | 1 | 2 | 1   | 1 | 1 | 1 |
| mid-altitude | 42 | 1 | 2 | 1   | 1 | 1 | 1 |
| mid-altitude | 24 | 1 | 4 | 1   | 1 | 1 | 1 |
| mid-altitude | 35 | 1 | 5 | 2   | 1 | 1 | 1 |
| mid-altitude | 30 | 1 | 4 | 1   | 1 | 1 | 1 |
| mid-altitude | 35 | 1 | 5 | 1   | 1 | 1 | 1 |
| mid-altitude | 40 | 1 | 2 | 2   | 1 | 1 | 1 |
| mid-altitude | 30 | 1 | 2 | 1   | 1 | 2 | 1 |
| mid-altitude | 22 | 2 | 4 | 2   | 1 | 2 | 1 |
| mid-altitude | 25 | 1 | 4 | 1   | 1 | 2 | 1 |
| mid-altitude | 27 | 1 | 3 | 1   | 1 | 2 | 1 |
| mid-altitude | 25 | 1 | 2 | 1   | 1 | 2 | 1 |
| mid-altitude | 42 | 2 | 2 | 1   | 1 | 2 | 4 |
| mid-altitude | 45 | 1 | 5 | 1   | 1 | 2 | 4 |
| mid-altitude | 38 | 1 | 4 | 2   | 1 | 2 | 4 |
| mid-altitude | 27 | 1 | 4 | 0   | 1 | 2 | 4 |
| mid-altitude | 50 | 1 | 5 | 2   | 1 | 2 | 4 |
| mid-altitude | 26 | 1 | 4 | 0   | 1 | 3 | 2 |
| mid-altitude | 47 | 1 | 2 | 2   | 1 | 3 | 2 |
| mid-altitude | 62 | 1 | 1 | 3   | 1 | 3 | 2 |
| mid-altitude | 42 | 1 | 2 | 3   | 1 | 3 | 2 |
| mid-altitude | 38 | 2 | 1 | 3   | 1 | 3 | 2 |
| mid-altitude | 45 | 1 | 1 | 2   | 1 | 4 | 3 |
| mid-altitude | 25 | 1 | 4 | 0   | 1 | 4 | 3 |
| mid-altitude | 40 | 1 | 1 | 1   | 1 | 4 | 3 |
| mid-altitude | 24 | 1 | 4 | 0   | 1 | 4 | 3 |
| mid-altitude | 35 | 1 | 1 | 1   | 1 | 4 | 3 |
| mid-altitude | 49 | 1 | 1 | 3   | 1 | 4 | 3 |
| mid-altitude | 38 | 1 | 1 | 1   | 1 | 4 | 3 |
| mid-altitude | 45 | 1 | 2 | 2   | 1 | 4 | 3 |
| mid-altitude | 26 | 1 | 4 | 0   | 1 | 4 | 3 |
| mid-altitude | 52 | 2 | 1 | 1   | 1 | 4 | 3 |
| Lowland      | 32 | 1 | 4 | 1.5 | 1 | 2 | 1 |
| Lowland      | 25 | 1 | 4 | 0.5 | 1 | 2 | 1 |
| Lowland      | 48 | 2 | 1 | 3   | 1 | 1 | 1 |
| Lowland      | 56 | 1 | 5 | 3   | 1 | 4 | 1 |
| Lowland      | 46 | 1 | 2 | 4   | 1 | 4 | 1 |

|         |    |   |   |     |   |   |   |
|---------|----|---|---|-----|---|---|---|
| Lowland | 45 | 2 | 2 | 1.5 | 1 | 1 | 1 |
| Lowland | 56 | 1 | 1 | 2.5 | 1 | 4 | 1 |
| Lowland | 32 | 1 | 5 | 1.5 | 1 | 4 | 1 |
| Lowland | 27 | 1 | 2 | 0.5 | 1 | 2 | 1 |
| Lowland | 42 | 1 | 2 | 0.5 | 1 | 4 | 1 |
| Lowland | 24 | 1 | 4 | 1   | 2 | 4 | 1 |
| Lowland | 35 | 1 | 5 | 2   | 2 | 4 | 1 |
| Lowland | 30 | 1 | 4 | 1   | 2 | 4 | 1 |
| Lowland | 35 | 1 | 5 | 1   | 2 | 4 | 1 |
| Lowland | 40 | 1 | 2 | 1.5 | 2 | 4 | 1 |
| Lowland | 30 | 1 | 2 | 1   | 1 | 2 | 1 |
| Lowland | 22 | 2 | 4 | 1.5 | 1 | 2 | 1 |
| Lowland | 25 | 1 | 4 | 0.5 | 1 | 2 | 1 |
| Lowland | 27 | 1 | 3 | 0.5 | 1 | 2 | 1 |
| Lowland | 25 | 1 | 2 | 1   | 1 | 2 | 1 |
| Lowland | 42 | 2 | 2 | 1   | 1 | 2 | 4 |
| Lowland | 45 | 1 | 5 | 1   | 1 | 1 | 4 |
| Lowland | 38 | 1 | 4 | 1.5 | 1 | 1 | 4 |
| Lowland | 27 | 1 | 4 | 0   | 1 | 1 | 4 |
| Lowland | 50 | 1 | 5 | 2   | 1 | 4 | 4 |
| Lowland | 26 | 1 | 4 | 0   | 1 | 4 | 2 |
| Lowland | 47 | 1 | 2 | 1.5 | 1 | 4 | 2 |
| Lowland | 62 | 1 | 1 | 3   | 1 | 4 | 2 |
| Lowland | 42 | 1 | 2 | 3   | 1 | 4 | 2 |
| Lowland | 38 | 2 | 1 | 2.5 | 1 | 4 | 2 |
| Lowland | 45 | 1 | 1 | 2   | 1 | 4 | 3 |
| Lowland | 25 | 1 | 4 | 0   | 1 | 4 | 3 |
| Lowland | 40 | 1 | 1 | 1   | 1 | 1 | 3 |
| Lowland | 24 | 1 | 4 | 0   | 1 | 1 | 3 |
| Lowland | 35 | 1 | 1 | 0.5 | 1 | 1 | 3 |
| Lowland | 49 | 1 | 1 | 3   | 1 | 1 | 3 |
| Lowland | 38 | 1 | 1 | 1   | 1 | 4 | 3 |
| Lowland | 45 | 1 | 2 | 1.5 | 1 | 4 | 3 |
| Lowland | 26 | 1 | 4 | 0   | 1 | 4 | 3 |
| Lowland | 52 | 2 | 1 | 0.5 | 1 | 4 | 3 |
| Lowland | 32 | 1 | 5 | 1   | 1 | 4 | 3 |
| Lowland | 41 | 1 | 1 | 2   | 1 | 4 | 3 |
| Lowland | 29 | 1 | 4 | 0   | 1 | 4 | 3 |
| Lowland | 47 | 1 | 1 | 0.5 | 1 | 4 | 3 |
| Lowland | 35 | 1 | 1 | 0   | 1 | 2 | 3 |

| ForsCons | ForestPolyan | Folnst | REST | StaT | TYPRESTN | WhoINt | Perc | partpn |   |
|----------|--------------|--------|------|------|----------|--------|------|--------|---|
| 2        | 5            | 5      | 5    | 1    | 1997     | 2      | 5    | 1      | 1 |
| 2        | 5            | 5      | 5    | 1    | 1983     | 2      | 1    | 1      | 1 |
| 2        | 5            | 5      | 5    | 1    | 1983     | 2      | 1    | 1      | 1 |
| 5        | 5            | 5      | 5    | 1    | 1983     | 2      | 1    | 1      | 1 |
| 5        | 5            | 5      | 5    | 1    | 1991     | 2      | 5    | 1      | 1 |
| 2        | 5            | 4      | 4    | 1    | 2000     | 4      | 1    | 1      | 1 |
| 2        | 3            | 5      | 5    | 1    | 1995     | 4      | 5    | 1      | 1 |
| 2        | 5            | 5      | 5    | 1    | 1996     | 2      | 1    | 2      | 1 |
| 5        | 5            | 5      | 5    | 1    | 1983     | 2      | 5    | 1      | 1 |
| 5        | 5            | 5      | 5    | 1    | 2000     | 2      | 4    | 1      | 1 |
| 2        | 3            | 5      | 5    | 1    | 1995     | 4      | 5    | 1      | 1 |
| 5        | 5            | 5      | 5    | 1    | 2000     | 2      | 4    | 2      | 1 |
| 2        | 5            | 5      | 5    | 1    | 1983     | 2      | 4    | 1      | 1 |
| 2        | 5            | 5      | 5    | 1    | 1983     | 2      | 4    | 1      | 1 |
| 2        | 5            | 5      | 5    | 1    | 1983     | 2      | 4    | 1      | 1 |
| 2        | 5            | 5      | 5    | 1    | 1997     | 2      | 5    | 1      | 1 |
| 2        | 5            | 5      | 5    | 1    | 1983     | 2      | 1    | 1      | 1 |
| 2        | 5            | 5      | 5    | 1    | 1983     | 2      | 1    | 1      | 1 |
| 2        | 5            | 5      | 5    | 1    | 1983     | 2      | 1    | 1      | 1 |
| 2        | 5            | 5      | 5    | 1    | 1983     | 2      | 1    | 1      | 1 |
| 2        | 5            | 5      | 5    | 1    | 1983     | 2      | 1    | 1      | 1 |
| 2        | 5            | 5      | 5    | 1    | 1983     | 2      | 1    | 1      | 1 |
| 2        | 5            | 5      | 5    | 1    | 1983     | 2      | 1    | 1      | 1 |
| 2        | 5            | 5      | 5    | 1    | 1983     | 2      | 1    | 1      | 1 |
| 2        | 5            | 5      | 5    | 1    | 1983     | 2      | 1    | 1      | 1 |
| 2        | 5            | 5      | 5    | 1    | 1983     | 2      | 1    | 1      | 1 |
| 2        | 5            | 5      | 5    | 1    | 1983     | 2      | 1    | 1      | 1 |
| 5        | 5            | 5      | 5    | 1    | 1983     | 2      | 1    | 1      | 1 |
| 5        | 5            | 5      | 5    | 1    | 1983     | 2      | 1    | 1      | 1 |
| 5        | 5            | 5      | 5    | 1    | 1983     | 2      | 1    | 1      | 1 |
| 5        | 5            | 5      | 5    | 1    | 1991     | 2      | 5    | 1      | 1 |
| 5        | 5            | 5      | 5    | 1    | 1991     | 2      | 5    | 1      | 1 |
| 5        | 5            | 5      | 5    | 1    | 1991     | 2      | 5    | 1      | 1 |
| 5        | 5            | 5      | 5    | 1    | 1991     | 2      | 5    | 1      | 1 |
| 2        | 5            | 4      | 4    | 1    | 2000     | 4      | 1    | 1      | 1 |
| 2        | 5            | 4      | 4    | 1    | 2000     | 4      | 1    | 1      | 1 |
| 2        | 5            | 4      | 4    | 1    | 2000     | 4      | 1    | 1      | 1 |
| 2        | 5            | 4      | 4    | 1    | 2000     | 4      | 1    | 1      | 1 |
| 2        | 3            | 5      | 5    | 1    | 1995     | 4      | 5    | 1      | 1 |
| 2        | 3            | 5      | 5    | 1    | 1995     | 4      | 5    | 1      | 1 |
| 2        | 3            | 5      | 5    | 1    | 1995     | 4      | 5    | 1      | 1 |
| 2        | 3            | 5      | 5    | 1    | 1995     | 4      | 5    | 1      | 1 |
| 5        | 5            | 5      | 5    | 1    | 2000     | 2      | 4    | 2      | 1 |
| 5        | 5            | 5      | 5    | 1    | 2000     | 2      | 4    | 2      | 1 |
| 5        | 5            | 5      | 5    | 1    | 2000     | 2      | 4    | 2      | 1 |
| 5        | 5            | 5      | 5    | 1    | 2000     | 2      | 4    | 2      | 1 |
| 5        | 5            | 5      | 5    | 1    | 1983     | 2      | 5    | 1      | 1 |
| 5        | 5            | 5      | 5    | 1    | 1983     | 2      | 5    | 1      | 1 |

|   |   |   |   |      |   |   |   |   |
|---|---|---|---|------|---|---|---|---|
| 5 | 5 | 5 | 1 | 1983 | 2 | 5 | 1 | 1 |
| 5 | 5 | 5 | 1 | 1983 | 2 | 5 | 1 | 1 |
| 2 | 2 | 2 | 1 | 2000 | 1 | 1 | 1 | 1 |
| 2 | 2 | 2 | 1 | 2000 | 1 | 1 | 1 | 1 |
| 2 | 2 | 2 | 1 | 2000 | 1 | 1 | 1 | 2 |
| 2 | 2 | 2 | 1 | 2000 | 1 | 1 | 1 | 2 |
| 2 | 2 | 2 | 1 | 2002 | 1 | 1 | 1 | 1 |
| 2 | 2 | 2 | 1 | 2002 | 2 | 2 | 1 | 2 |
| 2 | 2 | 2 | 1 | 2002 | 2 | 2 | 1 | 1 |
| 2 | 2 | 2 | 1 | 200  | 2 | 2 | 1 | 1 |
| 2 | 2 | 2 | 1 | 2000 | 2 | 2 | 1 | 1 |
| 2 | 2 | 2 | 1 | 2000 | 2 | 2 | 1 | 1 |
| 2 | 2 | 3 | 1 | 2000 | 2 | 3 | 2 | 1 |
| 2 | 2 | 3 | 1 | 2000 | 2 | 3 | 2 | 1 |
| 2 | 2 | 3 | 1 | 2000 | 2 | 3 | 3 | 1 |
| 2 | 2 | 3 | 1 | 2000 | 2 | 3 | 2 | 1 |
| 2 | 2 | 1 | 1 | 2000 | 2 | 3 | 1 | 1 |
| 2 | 2 | 1 | 1 | 2000 | 4 | 3 | 2 | 1 |
| 2 | 2 | 1 | 1 | 2005 | 4 | 3 | 1 | 1 |
| 2 | 2 | 3 | 1 | 2005 | 4 | 3 | 1 | 1 |
| 2 | 2 | 3 | 1 | 2006 | 4 | 3 | 1 | 1 |
| 2 | 2 | 2 | 1 | 2006 | 4 | 3 | 1 | 1 |
| 2 | 2 | 2 | 2 | 2000 | 4 | 3 | 3 | 2 |
| 2 | 2 | 3 | 2 | 2000 | 4 | 3 | 1 | 2 |
| 2 | 2 | 3 | 2 | 2000 | 4 | 3 | 1 | 1 |
| 2 | 2 | 2 | 2 | 2000 | 4 | 3 | 2 | 1 |
| 2 | 2 | 2 | 2 | 2000 | 4 | 3 | 1 | 1 |
| 2 | 2 | 2 | 2 | 2000 | 4 | 3 | 1 | 1 |
| 2 | 2 | 2 | 2 | 2000 | 4 | 5 | 3 | 1 |
| 2 | 2 | 2 | 2 | 2000 | 4 | 5 | 3 | 2 |
| 2 | 2 | 2 | 2 | 2005 | 4 | 5 | 1 | 2 |
| 2 | 3 | 2 | 1 | 1995 | 4 | 5 | 2 | 2 |
| 5 | 3 | 2 | 1 | 1995 | 4 | 5 | 1 | 1 |
| 5 | 3 | 2 | 1 | 1995 | 4 | 5 | 3 | 1 |
| 5 | 3 | 2 | 1 | 2000 | 4 | 5 | 1 | 1 |
| 5 | 3 | 2 | 1 | 2000 | 4 | 5 | 1 | 2 |
| 5 | 3 | 2 | 1 | 2000 | 4 | 5 | 1 | 2 |
| 5 | 3 | 3 | 1 | 2000 | 4 | 5 | 2 | 1 |
| 3 | 3 | 3 | 1 | 2000 | 4 | 5 | 1 | 1 |
| 3 | 3 | 3 | 1 | 2000 | 4 | 5 | 1 | 1 |
| 3 | 3 | 3 | 1 | 2000 | 3 | 5 | 1 | 1 |
| 3 | 3 | 3 | 1 | 1995 | 3 | 5 | 1 | 1 |
| 2 | 2 | 2 | 1 | 2000 | 1 | 1 | 1 | 2 |
| 2 | 2 | 2 | 1 | 2000 | 1 | 1 | 1 | 2 |
| 2 | 2 | 2 | 1 | 2000 | 1 | 1 | 1 | 2 |
| 2 | 2 | 2 | 1 | 2000 | 1 | 1 | 1 | 2 |
| 2 | 2 | 2 | 1 | 1995 | 1 | 1 | 1 | 2 |

|   |   |   |   |      |   |   |   |   |
|---|---|---|---|------|---|---|---|---|
| 2 | 2 | 2 | 1 | 1995 | 1 | 1 | 1 | 2 |
| 2 | 2 | 2 | 1 | 1995 | 1 | 1 | 1 | 2 |
| 2 | 2 | 2 | 1 | 1995 | 1 | 1 | 1 | 2 |
| 2 | 2 | 2 | 1 | 2000 | 1 | 1 | 1 | 2 |
| 2 | 2 | 2 | 1 | 2000 | 1 | 1 | 1 | 1 |
| 2 | 2 | 3 | 1 | 2000 | 1 | 1 | 2 | 1 |
| 2 | 2 | 3 | 1 | 2000 | 1 | 1 | 2 | 1 |
| 2 | 2 | 3 | 1 | 2000 | 1 | 1 | 2 | 1 |
| 2 | 2 | 3 | 1 | 2000 | 1 | 1 | 2 | 1 |
| 2 | 2 | 1 | 1 | 2000 | 1 | 1 | 2 | 1 |
| 2 | 2 | 1 | 1 | 2000 | 2 | 1 | 2 | 2 |
| 2 | 2 | 1 | 1 | 1995 | 2 | 1 | 2 | 2 |
| 2 | 2 | 3 | 1 | 1995 | 2 | 1 | 2 | 2 |
| 2 | 2 | 3 | 1 | 1995 | 2 | 1 | 2 | 1 |
| 2 | 2 | 2 | 1 | 1995 | 2 | 1 | 2 | 1 |
| 2 | 2 | 2 | 2 | 2000 | 2 | 1 | 2 | 1 |
| 2 | 2 | 3 | 2 | 2000 | 2 | 1 | 2 | 1 |
| 2 | 2 | 3 | 2 | 2000 | 2 | 1 | 2 | 1 |
| 2 | 2 | 2 | 2 | 2000 | 2 | 1 | 2 | 1 |
| 2 | 2 | 2 | 2 | 2000 | 2 | 1 | 2 | 1 |
| 2 | 2 | 2 | 2 | 2000 | 2 | 2 | 2 | 2 |
| 2 | 2 | 2 | 2 | 2000 | 2 | 2 | 2 | 2 |
| 2 | 2 | 2 | 2 | 2000 | 2 | 2 | 2 | 2 |
| 2 | 2 | 2 | 2 | 1995 | 2 | 2 | 2 | 2 |
| 2 | 3 | 2 | 1 | 1995 | 2 | 2 | 2 | 2 |
| 5 | 3 | 2 | 1 | 1995 | 3 | 2 | 2 | 2 |
| 5 | 3 | 2 | 1 | 1995 | 3 | 2 | 2 | 1 |
| 5 | 3 | 2 | 1 | 2000 | 3 | 2 | 2 | 1 |
| 5 | 3 | 2 | 1 | 2000 | 3 | 2 | 2 | 1 |
| 5 | 3 | 2 | 1 | 2000 | 3 | 2 | 2 | 2 |
| 5 | 3 | 3 | 1 | 2000 | 4 | 4 | 2 | 2 |
| 3 | 3 | 3 | 1 | 2000 | 4 | 4 | 2 | 2 |
| 3 | 3 | 3 | 1 | 2000 | 4 | 4 | 2 | 1 |
| 3 | 3 | 3 | 1 | 2000 | 4 | 4 | 2 | 1 |
| 3 | 3 | 3 | 1 | 1995 | 4 | 4 | 2 | 1 |
| 3 | 3 | 2 | 1 | 1995 | 4 | 4 |   | 2 |
| 3 | 3 | 2 | 1 | 1995 | 4 | 4 |   | 2 |
| 3 | 3 | 2 | 1 | 1995 | 4 | 4 |   |   |
| 3 | 3 | 2 | 1 | 2000 | 4 | 4 |   |   |
| 3 | 4 | 2 | 1 | 2000 | 4 | 4 |   |   |

| WHYPART | LevlofPart | EVAIn | ByWHatCri | Whoeva | SUCC | Grass | SoclVal | Diffculties |
|---------|------------|-------|-----------|--------|------|-------|---------|-------------|
| 1       | 1          | 1     | 5         | 4      | 1    | 420   | 5       | 1           |
| 1       | 2          | 1     | 5         | 6      | 1    | 0     | 5       | 1           |
| 2       | 4          | 1     | 1         | 1      | 1    | 600   | 1       | 1           |
| 1       | 1          | 1     | 5         | 5      | 1    | 480   | 5       | 1           |
| 1       | 1          | 1     | 5         | 1      | 1    | 480   | 5       | 1           |
| 2       | 2          | 1     | 1         | 1      | 1    | 1050  | 5       | 1           |
| 2       | 3          | 2     | 1         | 1      | 1    | 255   | 5       | 1           |
| 3       | 5          | 1     | 1         | 3      | 1    | 0     | 5       | 1           |
| 1       | 1          | 1     | 1         | 3      | 1    | 600   | 5       | 1           |
| 1       | 4          | 1     | 5         | 1      | 1    | 2000  | 5       | 1           |
| 2       | 3          | 2     | 1         | 1      | 1    | 250   | 5       | 1           |
| 2       | 4          | 1     | 5         | 3      | 1    | 100   | 5       | 1           |
| 1       | 2          | 1     | 1         | 1      | 1    | 360   | 1       | 1           |
| 1       | 2          | 1     | 1         | 1      | 1    | 360   | 1       | 1           |
| 1       | 2          | 1     | 1         | 1      | 1    | 360   | 1       | 1           |
| 1       | 1          | 1     | 5         | 4      | 1    | 420   | 5       | 1           |
| 1       | 2          | 1     | 5         | 6      | 1    | 0     | 5       | 1           |
| 1       | 2          | 1     | 5         | 6      | 1    | 0     | 5       | 1           |
| 1       | 2          | 1     | 5         | 6      | 1    | 0     | 5       | 1           |
| 1       | 2          | 1     | 5         | 6      | 1    | 0     | 5       | 1           |
| 2       | 4          | 1     | 1         | 1      | 1    | 600   | 1       | 1           |
| 2       | 4          | 1     | 1         | 1      | 1    | 600   | 1       | 1           |
| 2       | 4          | 1     | 1         | 1      | 1    | 600   | 1       | 1           |
| 1       | 1          | 1     | 5         | 5      | 1    | 480   | 5       | 1           |
| 1       | 1          | 1     | 5         | 5      | 1    | 480   | 5       | 1           |
| 1       | 1          | 1     | 5         | 5      | 1    | 480   | 5       | 1           |
| 1       | 1          | 1     | 5         | 5      | 1    | 480   | 5       | 1           |
| 1       | 1          | 1     | 5         | 1      | 1    | 480   | 5       | 1           |
| 1       | 1          | 1     | 5         | 1      | 1    | 480   | 5       | 1           |
| 1       | 1          | 1     | 5         | 1      | 1    | 480   | 5       | 1           |
| 1       | 1          | 1     | 5         | 1      | 1    | 480   | 5       | 1           |
| 1       | 1          | 1     | 5         | 1      | 1    | 480   | 5       | 1           |
| 2       | 2          | 1     | 1         | 1      | 1    | 1050  | 5       | 1           |
| 2       | 2          | 1     | 1         | 1      | 1    | 1050  | 5       | 1           |
| 2       | 2          | 1     | 1         | 1      | 1    | 1050  | 5       | 1           |
| 2       | 2          | 1     | 1         | 1      | 1    | 1050  | 5       | 1           |
| 2       | 3          | 2     | 1         | 1      | 1    | 250   | 5       | 1           |
| 2       | 3          | 2     | 1         | 1      | 1    | 250   | 5       | 1           |
| 2       | 3          | 2     | 1         | 1      | 1    | 250   | 5       | 1           |
| 2       | 3          | 2     | 1         | 1      | 1    | 250   | 5       | 1           |
| 2       | 4          | 1     | 5         | 3      | 1    | 100   | 5       | 1           |
| 2       | 4          | 1     | 5         | 3      | 1    | 100   | 5       | 1           |
| 2       | 4          | 1     | 5         | 3      | 1    | 100   | 5       | 1           |
| 2       | 4          | 1     | 5         | 3      | 1    | 100   | 5       | 1           |
| 1       | 1          | 1     | 1         | 3      | 1    | 600   | 5       | 1           |
| 1       | 1          | 1     | 1         | 3      | 1    | 600   | 5       | 1           |

|   |   |   |   |   |   |     |   |   |
|---|---|---|---|---|---|-----|---|---|
| 1 | 1 | 1 | 1 | 3 | 1 | 600 | 5 | 1 |
| 1 | 1 | 1 | 1 | 3 | 1 | 600 | 5 | 1 |
| 1 | 1 | 1 | 5 | 1 | 1 | 8   | 1 | 2 |
| 1 | 1 | 1 | 5 | 1 | 1 | 8   | 5 | 2 |
| 1 | 1 | 1 | 1 | 1 | 1 | 8   | 5 | 2 |
| 1 | 1 | 1 | 1 | 2 | 1 | 8   | 1 | 2 |
| 1 | 1 | 1 | 5 | 2 | 1 | 8   | 1 | 2 |
| 1 | 1 | 1 | 1 | 1 | 1 | 8   | 1 | 2 |
| 1 | 1 | 1 | 1 | 1 | 2 | 1   | 5 | 2 |
| 2 | 1 | 1 | 1 | 2 | 1 | 6   | 5 | 1 |
| 2 | 1 | 1 | 5 | 1 | 1 | 3   | 5 | 2 |
| 2 | 1 | 1 | 5 | 1 | 1 | 2   | 1 | 2 |
| 2 | 1 | 1 | 1 | 2 | 2 | 7   | 1 | 2 |
| 2 | 1 | 1 | 2 | 2 | 2 | 8   | 1 | 2 |
| 2 | 1 | 1 | 2 | 2 | 1 | 8   | 1 | 1 |
| 2 | 1 | 1 | 5 | 1 | 1 | 8   | 5 | 2 |
| 2 | 1 | 1 | 5 | 1 | 1 | 8   | 5 | 2 |
| 2 | 1 | 1 | 2 | 1 | 1 | 8   | 1 | 2 |
| 2 | 2 | 1 | 5 | 1 | 1 | 8   | 1 | 2 |
| 3 | 2 | 1 | 5 | 2 | 1 | 8   | 5 | 2 |
| 3 | 2 | 1 | 2 | 1 | 2 | 8   | 5 | 2 |
| 3 | 2 | 1 | 2 | 1 | 2 | 8   | 1 | 2 |
| 3 | 2 | 1 | 5 | 2 | 2 | 8   | 1 | 1 |
| 3 | 2 | 1 | 3 | 5 | 1 | 1   | 1 | 2 |
| 1 | 2 | 1 | 5 | 5 | 1 | 6   | 1 | 2 |
| 1 | 2 | 1 | 3 | 5 | 1 | 3   | 5 | 1 |
| 1 | 2 | 1 | 5 | 5 | 1 | 2   | 1 | 1 |
| 1 | 2 | 1 | 5 | 5 | 1 | 7   | 2 | 2 |
| 1 | 3 | 1 | 5 | 2 | 2 | 8   | 2 | 2 |
| 1 | 3 | 1 | 5 | 1 | 2 | 8   | 2 | 1 |
| 1 | 3 | 1 | 5 | 3 | 2 | 8   | 2 | 2 |
| 1 | 3 | 1 | 3 | 5 | 1 | 8   | 2 | 2 |
| 1 | 3 | 2 | 3 | 5 | 1 | 8   | 3 | 1 |
| 1 | 5 | 2 | 5 | 5 | 1 | 1   | 3 | 2 |
| 1 | 5 | 2 | 5 | 5 | 1 | 6   | 3 | 2 |
| 1 | 5 | 2 | 5 | 5 | 1 | 3   | 3 | 1 |
| 1 | 5 | 2 | 5 | 5 | 1 | 2   | 3 | 2 |
| 1 | 5 | 2 | 5 | 5 | 2 | 7   | 5 | 2 |
| 1 | 5 | 2 | 2 | 2 | 1 | 8   | 3 | 2 |
| 1 | 5 | 2 | 1 | 1 | 1 | 8   | 3 | 2 |
| 1 | 5 | 2 | 2 | 4 | 1 | 8   | 5 | 2 |
| 1 | 5 | 2 | 5 | 5 | 2 | 8   | 3 | 2 |
| 1 | 4 | 1 | 1 | 1 | 2 | 1   | 1 | 1 |
| 1 | 4 | 1 | 2 | 1 | 2 | 1   | 1 | 1 |
| 2 | 4 | 1 | 3 | 1 | 2 | 1   | 1 | 1 |
| 1 | 4 | 1 | 4 | 1 | 2 | 1   | 1 | 1 |
| 1 | 4 | 1 | 5 | 1 | 2 | 1   | 1 | 1 |

|   |   |   |   |   |   |    |   |   |
|---|---|---|---|---|---|----|---|---|
| 2 | 4 | 1 | 1 | 1 | 2 | 1  | 1 | 1 |
| 2 | 4 | 1 | 2 | 1 | 2 | 1  | 1 | 1 |
| 3 | 4 | 1 | 3 | 1 | 2 | 1  | 1 | 1 |
| 1 | 4 | 1 | 4 | 1 | 2 | 1  | 1 | 1 |
| 1 | 4 | 1 | 5 | 1 | 2 | 1  | 1 | 1 |
| 2 | 4 | 1 | 1 | 1 | 2 | 1  | 1 | 1 |
| 2 | 4 | 1 | 2 | 1 | 2 | 1  | 1 | 1 |
| 1 | 4 | 2 | 3 | 1 | 2 | 1  | 1 | 1 |
| 1 | 5 | 2 | 4 | 1 | 2 | 1  | 1 | 1 |
| 1 | 5 | 2 | 5 | 1 | 2 | 1  | 1 | 1 |
| 1 | 5 | 2 | 1 | 3 |   | 1  | 1 | 1 |
| 1 | 5 | 2 | 2 | 3 |   | 1  | 1 | 1 |
| 1 | 5 | 2 | 3 | 3 |   | 1  | 1 | 1 |
| 1 | 6 | 2 | 4 | 3 |   | 1  | 1 | 1 |
| 1 | 6 | 2 | 5 | 3 |   | 1  | 1 | 1 |
| 1 | 6 | 2 | 1 | 3 |   | 4  | 1 | 1 |
| 2 | 6 | 2 | 1 | 3 | 2 | 4  | 1 | 1 |
| 2 | 6 | 2 | 1 | 3 | 2 | 4  | 1 | 1 |
| 2 | 6 | 2 | 1 | 3 | 2 | 4  | 1 | 1 |
| 1 | 6 | 2 | 2 | 3 | 2 | 4  | 1 | 1 |
| 1 | 6 | 2 | 2 | 2 | 2 | 3  | 2 | 1 |
| 1 | 6 | 2 | 2 | 2 | 2 | 3  | 2 | 1 |
| 1 | 6 | 2 | 2 | 2 | 2 | 3  | 2 | 1 |
| 1 | 6 | 2 | 3 | 2 | 2 | 3  | 2 | 1 |
| 1 | 6 | 2 | 3 | 2 | 2 | 3  | 3 | 1 |
| 1 | 6 | 2 | 3 | 5 | 2 | 3  | 3 | 1 |
| 2 | 5 | 2 | 3 | 5 | 2 | 3  | 3 | 1 |
| 2 | 5 | 2 | 4 | 5 | 2 | 3  | 3 | 1 |
| 2 | 5 | 2 | 4 | 5 | 2 | 3  | 3 | 1 |
| 2 | 5 | 2 | 4 | 5 | 1 | 5  | 3 | 1 |
| 2 | 1 | 2 | 5 | 7 | 1 | 55 | 3 | 2 |
| 2 | 1 | 2 | 5 | 5 | 1 | 5  | 3 | 2 |
| 2 | 1 | 2 | 5 | 5 | 1 | 5  | 3 | 2 |
| 2 | 1 | 2 | 5 | 5 | 1 | 5  | 3 | 2 |
| 2 | 1 | 2 | 5 | 7 | 1 | 5  | 5 | 2 |
| 2 | 3 | 2 | 5 | 7 |   | 5  | 5 | 2 |
| 1 | 3 | 2 | 5 | 7 |   | 5  | 5 | 2 |
| 1 | 3 | 2 | 5 | 7 | 1 | 5  | 5 | 2 |
| 1 | 3 | 2 | 5 | 7 | 1 | 5  | 5 | 2 |



|   |   |   |   |   |   |   |   |
|---|---|---|---|---|---|---|---|
| 1 | 3 | 1 | 4 | 1 | 1 | 1 | 1 |
| 1 | 3 | 1 | 4 | 1 | 1 | 1 | 1 |
| 1 | 3 | 1 | 1 | 1 | 1 | 2 | 1 |
| 1 | 3 | 1 | 1 | 1 | 1 | 2 | 1 |
| 1 | 3 | 1 | 1 | 1 | 1 | 2 | 1 |
| 1 | 3 | 1 | 1 | 1 | 1 | 2 | 1 |
| 1 | 3 | 1 | 1 | 1 | 1 | 2 | 1 |
| 1 | 3 | 1 | 1 | 1 | 1 | 2 | 1 |
| 1 | 1 | 1 | 1 | 1 | 1 | 1 | 1 |
| 1 | 3 | 1 | 2 |   | 1 | 1 | 3 |
| 1 | 3 | 1 | 1 |   | 1 | 1 | 1 |
| 1 | 3 | 1 | 1 | 1 | 1 | 1 | 1 |
| 1 | 3 | 1 | 2 | 1 | 1 | 1 | 1 |
| 1 | 2 | 1 | 2 | 1 | 1 | 2 | 3 |
| 1 | 3 | 1 | 1 | 1 | 1 | 2 | 1 |
| 1 | 3 | 2 | 1 | 1 | 1 | 2 | 3 |
| 2 | 3 | 2 | 1 |   | 1 | 1 | 1 |
| 1 | 3 | 1 | 1 | 1 | 1 | 1 | 1 |
| 1 | 3 | 1 | 1 | 1 | 1 | 1 | 3 |
| 2 | 1 | 1 | 2 | 1 | 1 | 2 | 1 |
|   | 3 | 1 | 2 | 2 | 1 | 1 | 2 |
|   | 3 | 1 | 1 | 1 | 1 | 2 | 1 |
| 2 | 1 | 1 | 1 | 1 |   | 1 | 2 |
| 1 | 3 | 2 | 1 | 1 | 1 | 2 | 1 |
| 1 | 3 | 2 | 2 | 2 | 1 | 2 | 2 |
| 1 | 1 | 1 | 1 | 2 | 1 | 2 | 1 |
| 1 | 3 | 1 | 1 | 1 | 1 | 2 | 2 |
| 1 | 2 | 1 | 1 | 1 | 1 | 2 | 1 |
| 1 | 3 | 1 | 1 | 1 | 1 | 2 | 2 |
| 2 | 1 | 1 | 3 | 1 |   | 2 | 2 |
| 1 |   | 1 | 3 | 1 |   | 2 | 2 |
| 1 | 3 | 1 | 3 | 1 | 1 | 2 | 3 |
| 1 | 3 | 2 | 3 | 1 | 1 | 2 | 3 |
| 2 | 3 | 1 | 1 | 2 | 2 | 2 | 3 |
| 1 | 3 | 1 | 3 | 2 | 2 | 2 |   |
| 2 | 3 | 1 | 1 | 1 | 2 | 2 | 1 |
| 1 |   |   | 3 | 2 |   | 1 | 1 |
| 1 | 3 | 1 | 1 | 1 | 2 | 2 | 1 |
|   | 3 | 1 | 1 | 2 | 2 | 2 | 1 |
| 1 | 3 | 2 | 3 |   | 2 | 2 | 2 |
| 2 |   | 2 | 3 | 1 | 2 | 2 | 2 |
| 2 | 3 | 1 | 3 | 1 | 1 | 2 | 3 |
| 1 | 3 | 1 | 1 | 1 | 2 | 1 | 1 |
| 1 | 3 | 1 | 1 | 1 | 2 | 1 | 1 |
| 1 | 3 | 1 | 1 | 1 | 2 | 1 | 1 |
| 1 |   | 1 | 1 |   | 2 | 1 | 1 |
| 1 | 3 | 1 | 1 | 1 | 2 | 1 | 1 |

|   |   |   |   |   |   |   |   |
|---|---|---|---|---|---|---|---|
| 1 | 3 | 1 | 1 | 1 | 2 | 2 | 1 |
| 1 | 3 | 1 | 1 | 1 | 2 | 2 | 1 |
| 1 | 3 | 1 | 1 |   | 2 | 1 | 1 |
| 1 |   |   | 1 | 1 |   | 1 | 1 |
| 1 |   | 1 | 2 | 1 |   | 2 | 1 |
| 1 |   | 1 | 2 | 1 |   | 2 | 1 |
| 1 | 3 | 1 | 2 | 1 |   | 2 |   |
| 1 | 3 |   | 1 | 1 |   | 1 |   |
| 1 | 3 | 1 | 1 | 1 | 2 | 1 |   |
| 1 | 3 | 1 | 1 | 1 | 2 | 1 |   |
| 1 | 3 | 1 | 1 | 1 | 2 | 1 |   |
| 1 | 3 | 1 | 1 | 1 |   | 1 | 1 |
| 1 | 3 | 1 | 1 |   |   | 1 | 1 |
| 1 | 3 |   | 1 | 1 | 2 | 1 | 1 |
| 1 | 3 | 1 | 1 | 1 | 2 | 2 | 1 |
| 1 | 3 | 1 | 2 | 1 | 2 | 2 | 1 |
| 1 | 3 | 1 | 2 | 1 | 2 | 2 | 1 |
| 1 | 3 | 1 |   |   | 2 | 1 | 1 |
| 1 | 3 | 1 |   | 1 | 1 | 1 | 1 |
| 1 | 3 | 1 |   | 1 | 1 |   |   |
| 1 | 3 | 1 | 1 | 1 | 1 | 1 |   |
| 1 | 3 | 1 | 1 | 1 | 1 | 1 |   |
| 1 | 3 | 1 | 1 | 1 | 1 | 1 |   |
| 1 | 3 | 1 | 1 | 1 | 1 | 1 | 1 |
| 1 |   | 1 | 4 | 1 | 2 | 1 | 1 |
| 1 |   | 1 | 4 | 1 | 2 | 1 | 1 |
| 1 |   | 1 | 4 | 1 | 2 | 1 |   |
| 1 | 3 | 1 | 4 | 1 | 2 | 1 | 1 |
| 1 | 2 | 1 | 4 | 1 | 2 | 1 | 2 |
| 1 | 1 | 1 | 4 |   |   | 1 | 2 |
| 1 | 2 | 1 | 4 | 1 | 2 | 1 |   |
| 1 | 1 | 1 | 1 | 1 | 1 |   | 2 |
| 1 | 2 | 1 | 1 | 1 | 1 |   | 1 |
| 1 | 1 |   | 1 | 1 |   |   | 2 |
| 1 | 2 | 1 | 1 |   |   | 1 | 1 |
| 1 | 1 | 1 | 2 | 1 | 2 | 1 | 1 |
| 1 | 3 | 1 | 2 | 1 | 2 | 1 | 1 |
| 1 | 3 |   | 2 | 1 | 2 | 1 | 2 |
| 1 |   | 1 | 1 | 1 | 2 | 1 | 2 |
| 1 |   | 1 | 1 | 1 | 2 |   | 1 |
